# Supplementary material
Source: PubMed Central journal article supplement (PMC3858105)
Supplement: supp_kwt209_kwt209supp.pdf [file supp_kwt209_kwt209supp.pdf]

**Web Table 1.** Cumulative Probability (Unadjusted) Over 18 Years and Age-adjusted and Multivariate-adjusted Hazard Ratios for Death (Underlying Cause) by ALT Decile *After Excluding the First 3 Years of Follow-up* in the United States, 1988–2006

| Mortality Outcome/<br>ALT Decile <sup>a</sup> | No. of Deaths | Unadjusted Cumulative Mortality <sup>b</sup> | Age-adjusted ( <i>n</i> = 14,334) |              |                | Multivariate-adjusted ( <i>n</i> = 12,874) |               |                |
|-----------------------------------------------|---------------|----------------------------------------------|-----------------------------------|--------------|----------------|--------------------------------------------|---------------|----------------|
|                                               |               |                                              | Hazard Ratio <sup>c</sup>         | 95% CI       | <i>P</i> Value | Hazard Ratio <sup>d</sup>                  | 95% CI        | <i>P</i> Value |
| All causes                                    |               |                                              |                                   |              |                |                                            |               |                |
| 1st                                           | 638           | 31.0                                         | 1.61                              | 1.39, 1.85   | <0.001         | 1.47                                       | 1.25, 1.73    | <0.001         |
| 2nd                                           | 318           | 26.5                                         | 1.39                              | 1.16, 1.66   | <0.001         | 1.27                                       | 1.04, 1.56    | 0.018          |
| 3rd                                           | 411           | 24.9                                         | 1.34                              | 1.11, 1.62   | 0.003          | 1.35                                       | 1.11, 1.64    | 0.003          |
| 4th–9th                                       | 1,507         | 15.9                                         | 1.00                              |              |                | 1.00                                       |               |                |
| 10th                                          | 184           | 16.2                                         | 1.36                              | 1.03, 1.78   | 0.029          | 1.27                                       | 0.92, 1.76    | 0.14           |
| CVD                                           |               |                                              |                                   |              |                |                                            |               |                |
| 1st                                           | 248           | 14.6                                         | 1.67                              | 1.36, 2.06   | <0.001         | 1.47                                       | 1.14, 1.90    | 0.003          |
| 2nd                                           | 127           | 8.1                                          | 1.30                              | 0.98, 1.73   | 0.067          | 1.13                                       | 0.79, 1.60    | 0.50           |
| 3rd                                           | 145           | 10.7                                         | 1.27                              | 0.90, 1.79   | 0.17           | 1.24                                       | 0.87, 1.77    | 0.23           |
| 4th–9th                                       | 533           | 6.0                                          | 1.00                              |              |                | 1.00                                       |               |                |
| 10th                                          | 52            | 3.3                                          | 1.05                              | 0.66, 1.66   | 0.85           | 0.94                                       | 0.58, 1.52    | 0.81           |
| Cancer                                        |               |                                              |                                   |              |                |                                            |               |                |
| 1st                                           | 134           | 7.1                                          | 1.63                              | 1.20, 2.22   | 0.002          | 1.59                                       | 1.14, 2.22    | 0.007          |
| 2nd                                           | 70            | 9.7                                          | 1.48                              | 1.05, 2.08   | 0.027          | 1.41                                       | 0.96, 2.08    | 0.078          |
| 3rd                                           | 100           | 6.7                                          | 1.59                              | 1.09, 2.32   | 0.018          | 1.63                                       | 1.07, 2.48    | 0.023          |
| 4th–9th                                       | 341           | 4.0                                          | 1.00                              |              |                | 1.00                                       |               |                |
| 10th                                          | 40            | 5.1                                          | 1.03                              | 0.65, 1.64   | 0.89           | 0.95                                       | 0.53, 1.71    | 0.87           |
| Diabetes                                      |               |                                              |                                   |              |                |                                            |               |                |
| 1st                                           | 15            | 0.49                                         | 0.79                              | 0.31, 2.04   | 0.62           | 0.70                                       | 0.31, 1.56    | 0.37           |
| 2nd                                           | 9             | 0.69                                         | 1.76                              | 0.70, 4.47   | 0.23           | 3.47                                       | 1.15, 10.48   | 0.028          |
| 3rd                                           | 9             | 0.15                                         | 0.34                              | 0.16, 0.77   | 0.010          | 0.63                                       | 0.25, 1.61    | 0.33           |
| 4th–9th                                       | 59            | 0.52                                         | 1.00                              |              |                | 1.00                                       |               |                |
| 10th                                          | 11            | 1.7                                          | 2.86                              | 0.99, 8.30   | 0.053          | 1.51                                       | 0.49, 4.59    | 0.46           |
| Liver disease                                 |               |                                              |                                   |              |                |                                            |               |                |
| 1st                                           | 1             | 0.0019                                       | 0.016                             | 0.0012, 0.21 | 0.002          | 0.012                                      | 0.00071, 0.22 | 0.003          |

|         |     |       |      |             |        |      |             |       |
|---------|-----|-------|------|-------------|--------|------|-------------|-------|
| 2nd     | 1   | 0.046 | 0.42 | 0.050, 3.59 | 0.42   | 0.37 | 0.035, 3.97 | 0.40  |
| 3rd     | 2   | 0.016 | 0.13 | 0.018, 0.88 | 0.037  | 0.12 | 0.016, 0.91 | 0.041 |
| 4th–9th | 10  | 0.14  | 1.00 |             |        | 1.00 |             |       |
| 10th    | 14  | 0.62  | 7.43 | 2.08, 26.57 | 0.003  | 5.35 | 1.87, 15.28 | 0.002 |
| Other   |     |       |      |             |        |      |             |       |
| 1st     | 240 | 12.6  | 1.56 | 1.26, 1.93  | <0.001 | 1.43 | 1.10, 1.86  | 0.009 |
| 2nd     | 111 | 10.8  | 1.38 | 1.08, 1.77  | 0.011  | 1.26 | 0.95, 1.66  | 0.10  |
| 3rd     | 155 | 9.7   | 1.33 | 1.03, 1.72  | 0.030  | 1.29 | 0.96, 1.73  | 0.094 |
| 4th–9th | 564 | 6.2   | 1.00 |             |        | 1.00 |             |       |
| 10th    | 67  | 6.4   | 1.63 | 1.13, 2.35  | 0.010  | 1.69 | 1.09, 2.61  | 0.020 |

Abbreviations: ALT, alanine aminotransferase; CI, confidence interval; CVD, cardiovascular disease.

<sup>a</sup> Cutpoints (IU/L) were as follows: for men, 9, 11, 13, and 33; for women, 7, 8, 9, and 22.

<sup>b</sup> Estimated using Kaplan-Meier analysis.

<sup>c</sup> Estimated using Cox proportional hazards regression analysis.

<sup>d</sup> Adjusted for age, sex, race/ethnicity, education, body mass index, waist:hip ratio, glucose status (physician-diagnosed diabetes, hemoglobin A<sub>1c</sub> ≥6.5%), total cholesterol, high-density lipoprotein cholesterol, systolic blood pressure, diastolic blood pressure, C-reactive protein, estimated glomerular filtration rate, transferrin saturation, smoking, alcohol drinking, caffeine, and physical activity.

<sup>e</sup> Nonmalignant.

**Web Table 2.** Cumulative Probability (Unadjusted) Over 18 Years and Age-adjusted and Multivariate-adjusted Hazard Ratios for Death (Underlying Cause) by ALT Decile *Including Participants With Viral Hepatitis* in the United States, 1988–2006

| Mortality Outcome/<br>ALT Decile <sup>a</sup> | No. of Deaths | Unadjusted Cumulative Mortality <sup>b</sup> | Age-adjusted ( <i>n</i> = 15,502) |             |                | Multivariate-adjusted ( <i>n</i> = 13,835) |             |                |
|-----------------------------------------------|---------------|----------------------------------------------|-----------------------------------|-------------|----------------|--------------------------------------------|-------------|----------------|
|                                               |               |                                              | Hazard Ratio <sup>c</sup>         | 95% CI      | <i>P</i> Value | Hazard Ratio <sup>d</sup>                  | 95% CI      | <i>P</i> Value |
| All causes                                    |               |                                              |                                   |             |                |                                            |             |                |
| 1st                                           | 831           | 34.6                                         | 1.59                              | 1.39, 1.81  | <0.001         | 1.39                                       | 1.22, 1.59  | <0.001         |
| 2nd                                           | 405           | 29.6                                         | 1.42                              | 1.21, 1.67  | <0.001         | 1.24                                       | 1.04, 1.49  | 0.020          |
| 3rd                                           | 506           | 26.5                                         | 1.27                              | 1.07, 1.51  | 0.006          | 1.23                                       | 1.03, 1.47  | 0.021          |
| 4th–9th                                       | 1,831         | 17.6                                         | 1.00                              |             |                | 1.00                                       |             |                |
| 10th                                          | 286           | 19.3                                         | 1.51                              | 1.25, 1.84  | <0.001         | 1.42                                       | 1.13, 1.78  | 0.004          |
| CVD                                           |               |                                              |                                   |             |                |                                            |             |                |
| 1st                                           | 334           | 16.2                                         | 1.62                              | 1.33, 1.96  | <0.001         | 1.38                                       | 1.09, 1.75  | 0.008          |
| 2nd                                           | 162           | 9.3                                          | 1.32                              | 1.01, 1.74  | 0.045          | 1.09                                       | 0.78, 1.53  | 0.60           |
| 3rd                                           | 191           | 11.4                                         | 1.25                              | 0.90, 1.73  | 0.18           | 1.18                                       | 0.84, 1.66  | 0.33           |
| 4th–9th                                       | 641           | 6.6                                          | 1.00                              |             |                | 1.00                                       |             |                |
| 10th                                          | 73            | 4.5                                          | 1.28                              | 0.89, 1.83  | 0.18           | 1.08                                       | 0.74, 1.58  | 0.68           |
| Cancer                                        |               |                                              |                                   |             |                |                                            |             |                |
| 1st                                           | 174           | 8.5                                          | 1.69                              | 1.32, 2.16  | <0.001         | 1.57                                       | 1.18, 2.08  | 0.003          |
| 2nd                                           | 91            | 11.0                                         | 1.62                              | 1.21, 2.17  | 0.002          | 1.48                                       | 1.04, 2.10  | 0.030          |
| 3rd                                           | 116           | 7.0                                          | 1.43                              | 1.01, 2.02  | 0.043          | 1.42                                       | 0.95, 2.12  | 0.083          |
| 4th–9th                                       | 415           | 4.4                                          | 1.00                              |             |                | 1.00                                       |             |                |
| 10th                                          | 58            | 5.2                                          | 0.98                              | 0.65, 1.48  | 0.94           | 0.90                                       | 0.54, 1.49  | 0.67           |
| Diabetes                                      |               |                                              |                                   |             |                |                                            |             |                |
| 1st                                           | 20            | 0.63                                         | 1.00                              | 0.40, 2.47  | 1.0            | 0.63                                       | 0.32, 1.26  | 0.19           |
| 2nd                                           | 13            | 0.80                                         | 1.82                              | 0.78, 4.24  | 0.16           | 3.13                                       | 1.20, 8.15  | 0.020          |
| 3rd                                           | 12            | 0.18                                         | 0.37                              | 0.18, 0.77  | 0.009          | 0.69                                       | 0.27, 1.75  | 0.42           |
| 4th–9th                                       | 66            | 0.56                                         | 1.00                              |             |                | 1.00                                       |             |                |
| 10th                                          | 17            | 1.8                                          | 3.29                              | 1.32, 8.18  | 0.012          | 1.89                                       | 0.69, 5.15  | 0.21           |
| Liver disease                                 |               |                                              |                                   |             |                |                                            |             |                |
| 1st                                           | 3             | 0.10                                         | 0.55                              | 0.067, 4.47 | 0.57           | 0.46                                       | 0.052, 4.05 | 0.48           |

|         |     |       |       |             |        |      |             |        |
|---------|-----|-------|-------|-------------|--------|------|-------------|--------|
| 2nd     | 1   | 0.045 | 0.22  | 0.032, 1.52 | 0.12   | 0.14 | 0.020, 1.01 | 0.051  |
| 3rd     | 3   | 0.027 | 0.14  | 0.030, 0.64 | 0.013  | 0.12 | 0.026, 0.57 | 0.009  |
| 4th–9th | 17  | 0.21  | 1.00  |             |        | 1.00 |             |        |
| 10th    | 29  | 1.7   | 10.21 | 3.78, 27.61 | <0.001 | 6.81 | 2.84, 16.34 | <0.001 |
| Other   |     |       |       |             |        |      |             |        |
| 1st     | 300 | 14.1  | 1.52  | 1.27, 1.82  | <0.001 | 1.31 | 1.04, 1.66  | 0.023  |
| 2nd     | 138 | 12.0  | 1.38  | 1.11, 1.72  | 0.005  | 1.19 | 0.93, 1.51  | 0.16   |
| 3rd     | 184 | 10.6  | 1.28  | 1.01, 1.63  | 0.044  | 1.20 | 0.90, 1.59  | 0.20   |
| 4th–9th | 692 | 7.0   | 1.00  |             |        | 1.00 |             |        |
| 10th    | 109 | 7.6   | 1.65  | 1.24, 2.19  | 0.001  | 1.73 | 1.26, 2.38  | 0.001  |

Abbreviations: ALT, alanine aminotransferase; CI, confidence interval; CVD, cardiovascular disease.

<sup>a</sup> Cutpoints (IU/L) were as follows: for men, 9, 11, 13, and 33; for women, 7, 8, 9, and 22.

<sup>b</sup> Estimated using Kaplan-Meier analysis.

<sup>c</sup> Estimated using Cox proportional hazards regression analysis.

<sup>d</sup> Adjusted for age, sex, race/ethnicity, education, body mass index, waist:hip ratio, glucose status (physician-diagnosed diabetes, hemoglobin A<sub>1c</sub> ≥6.5%), total cholesterol, high-density lipoprotein cholesterol, systolic blood pressure, diastolic blood pressure, C-reactive protein, estimated glomerular filtration rate, transferrin saturation, smoking, alcohol drinking, caffeine, and physical activity.

<sup>e</sup> Nonmalignant.

**Web Table 3.** Cumulative Probability (Unadjusted) Over 18 Years and Age-adjusted and Multivariate-adjusted Hazard Ratios for Death (Underlying Cause) by *AST Decile* in the United States, 1988–2006

| Mortality Outcome/<br>AST Decile <sup>a</sup> | No. of Deaths | Unadjusted Cumulative Mortality <sup>b</sup> | Age-adjusted ( <i>n</i> = 14,950) |              |                | Multivariate-adjusted ( <i>n</i> = 13,360) |              |                |
|-----------------------------------------------|---------------|----------------------------------------------|-----------------------------------|--------------|----------------|--------------------------------------------|--------------|----------------|
|                                               |               |                                              | Hazard Ratio <sup>c</sup>         | 95% CI       | <i>P</i> Value | Hazard Ratio <sup>d</sup>                  | 95% CI       | <i>P</i> Value |
| All causes                                    |               |                                              |                                   |              |                |                                            |              |                |
| 1st                                           | 506           | 24.5                                         | 1.87                              | 1.63, 2.14   | <0.001         | 1.37                                       | 1.18, 1.58   | <0.001         |
| 2nd                                           | 193           | 16.8                                         | 1.27                              | 1.03, 1.57   | 0.026          | 1.20                                       | 0.99, 1.46   | 0.069          |
| 3rd                                           | 450           | 26.5                                         | 1.24                              | 1.10, 1.40   | 0.001          | 1.05                                       | 0.93, 1.19   | 0.46           |
| 4th–9th                                       | 2,108         | 20.5                                         | 1.00                              |              |                | 1.00                                       |              |                |
| 10th                                          | 417           | 23.7                                         | 1.18                              | 1.01, 1.37   | 0.041          | 1.13                                       | 0.94, 1.36   | 0.19           |
| CVD                                           |               |                                              |                                   |              |                |                                            |              |                |
| 1st                                           | 189           | 7.2                                          | 1.71                              | 1.37, 2.15   | <0.001         | 1.12                                       | 0.84, 1.49   | 0.44           |
| 2nd                                           | 50            | 3.6                                          | 0.80                              | 0.56, 1.15   | 0.22           | 0.70                                       | 0.49, 1.00   | 0.049          |
| 3rd                                           | 185           | 16.1                                         | 1.32                              | 1.07, 1.63   | 0.010          | 1.08                                       | 0.84, 1.38   | 0.54           |
| 4th–9th                                       | 813           | 8.2                                          | 1.00                              |              |                | 1.00                                       |              |                |
| 10th                                          | 127           | 8.0                                          | 1.11                              | 0.86, 1.44   | 0.40           | 1.10                                       | 0.84, 1.42   | 0.49           |
| Cancer                                        |               |                                              |                                   |              |                |                                            |              |                |
| 1st                                           | 137           | 8.3                                          | 2.48                              | 1.97, 3.12   | <0.001         | 1.98                                       | 1.51, 2.60   | <0.001         |
| 2nd                                           | 58            | 7.0                                          | 2.06                              | 1.52, 2.79   | <0.001         | 1.91                                       | 1.41, 2.58   | <0.001         |
| 3rd                                           | 99            | 5.2                                          | 1.27                              | 0.94, 1.72   | 0.12           | 1.10                                       | 0.79, 1.55   | 0.56           |
| 4th–9th                                       | 444           | 4.9                                          | 1.00                              |              |                | 1.00                                       |              |                |
| 10th                                          | 80            | 6.4                                          | 1.00                              | 0.71, 1.40   | 0.99           | 0.98                                       | 0.66, 1.47   | 0.92           |
| Diabetes                                      |               |                                              |                                   |              |                |                                            |              |                |
| 1st                                           | 18            | 0.64                                         | 2.63                              | 1.00, 6.89   | 0.050          | 1.12                                       | 0.35, 3.56   | 0.84           |
| 2nd                                           | 14            | 0.80                                         | 3.45                              | 0.85, 13.96  | 0.082          | 1.22                                       | 0.51, 2.92   | 0.65           |
| 3rd                                           | 14            | 0.46                                         | 1.98                              | 0.81, 4.81   | 0.13           | 1.50                                       | 0.34, 6.71   | 0.59           |
| 4th–9th                                       | 51            | 0.42                                         | 1.00                              |              |                | 1.00                                       |              |                |
| 10th                                          | 19            | 1.9                                          | 2.98                              | 1.45, 6.11   | 0.004          | 1.40                                       | 0.64, 3.08   | 0.39           |
| Liver disease                                 |               |                                              |                                   |              |                |                                            |              |                |
| 1st                                           | 1             | 0.0016                                       | 0.019                             | 0.0015, 0.22 | 0.002          | 0.028                                      | 0.0028, 0.29 | 0.003          |

|         |     |        |       |              |        |       |               |        |
|---------|-----|--------|-------|--------------|--------|-------|---------------|--------|
| 2nd     | 1   | 0.045  | 0.51  | 0.064, 4.16  | 0.53   | 0.45  | 0.039, 5.25   | 0.52   |
| 3rd     | 1   | 0.0042 | 0.025 | 0.0026, 0.24 | 0.002  | 0.023 | 0.00058, 0.87 | 0.042  |
| 4th–9th | 9   | 0.14   | 1.00  |              |        | 1.00  |               |        |
| 10th    | 25  | 1.1    | 10.71 | 3.36, 34.10  | <0.001 | 5.73  | 2.24, 14.67   | <0.001 |
| Other   |     |        |       |              |        |       |               |        |
| 1st     | 161 | 10.8   | 1.62  | 1.24, 2.11   | <0.001 | 1.21  | 0.90, 1.64    | 0.21   |
| 2nd     | 70  | 6.4    | 1.12  | 0.77, 1.63   | 0.55   | 1.13  | 0.77, 1.65    | 0.54   |
| 3rd     | 151 | 7.2    | 1.13  | 0.86, 1.50   | 0.38   | 0.98  | 0.73, 1.31    | 0.88   |
| 4th–9th | 791 | 8.3    | 1.00  |              |        | 1.00  |               |        |
| 10th    | 166 | 8.6    | 1.14  | 0.90, 1.43   | 0.28   | 1.14  | 0.87, 1.50    | 0.34   |

Abbreviations: ALT, alanine aminotransferase; CI, confidence interval; CVD, cardiovascular disease.

<sup>a</sup> Cutpoints (IU/L) were as follows: for men, 15, 16, 18, and 30; for women, 13, 14, 15, and 26.

<sup>b</sup> Estimated using Kaplan-Meier analysis.

<sup>c</sup> Estimated using Cox proportional hazards regression analysis.

<sup>d</sup> Adjusted for age, sex, race/ethnicity, education, body mass index, waist:hip ratio, glucose status (physician-diagnosed diabetes, hemoglobin A<sub>1c</sub> ≥ 6.5%), total serum cholesterol, high-density lipoprotein cholesterol, systolic blood pressure, diastolic blood pressure, C-reactive protein, estimated glomerular filtration rate, transferrin saturation, smoking, alcohol drinking, caffeine, and physical activity.

<sup>e</sup> Nonmalignant.
